# Supplementary figures and images for: Drosophila happyhour modulates JNK-dependent apoptosis
Source: PubMed Central journal article supplement — Cell Death Dis. 2010 Aug 19;1(8):e66–. doi: 10.1038/cddis.2010.44 (PMC3032524; doi:10.1038/cddis.2010.44), 2010-08-19

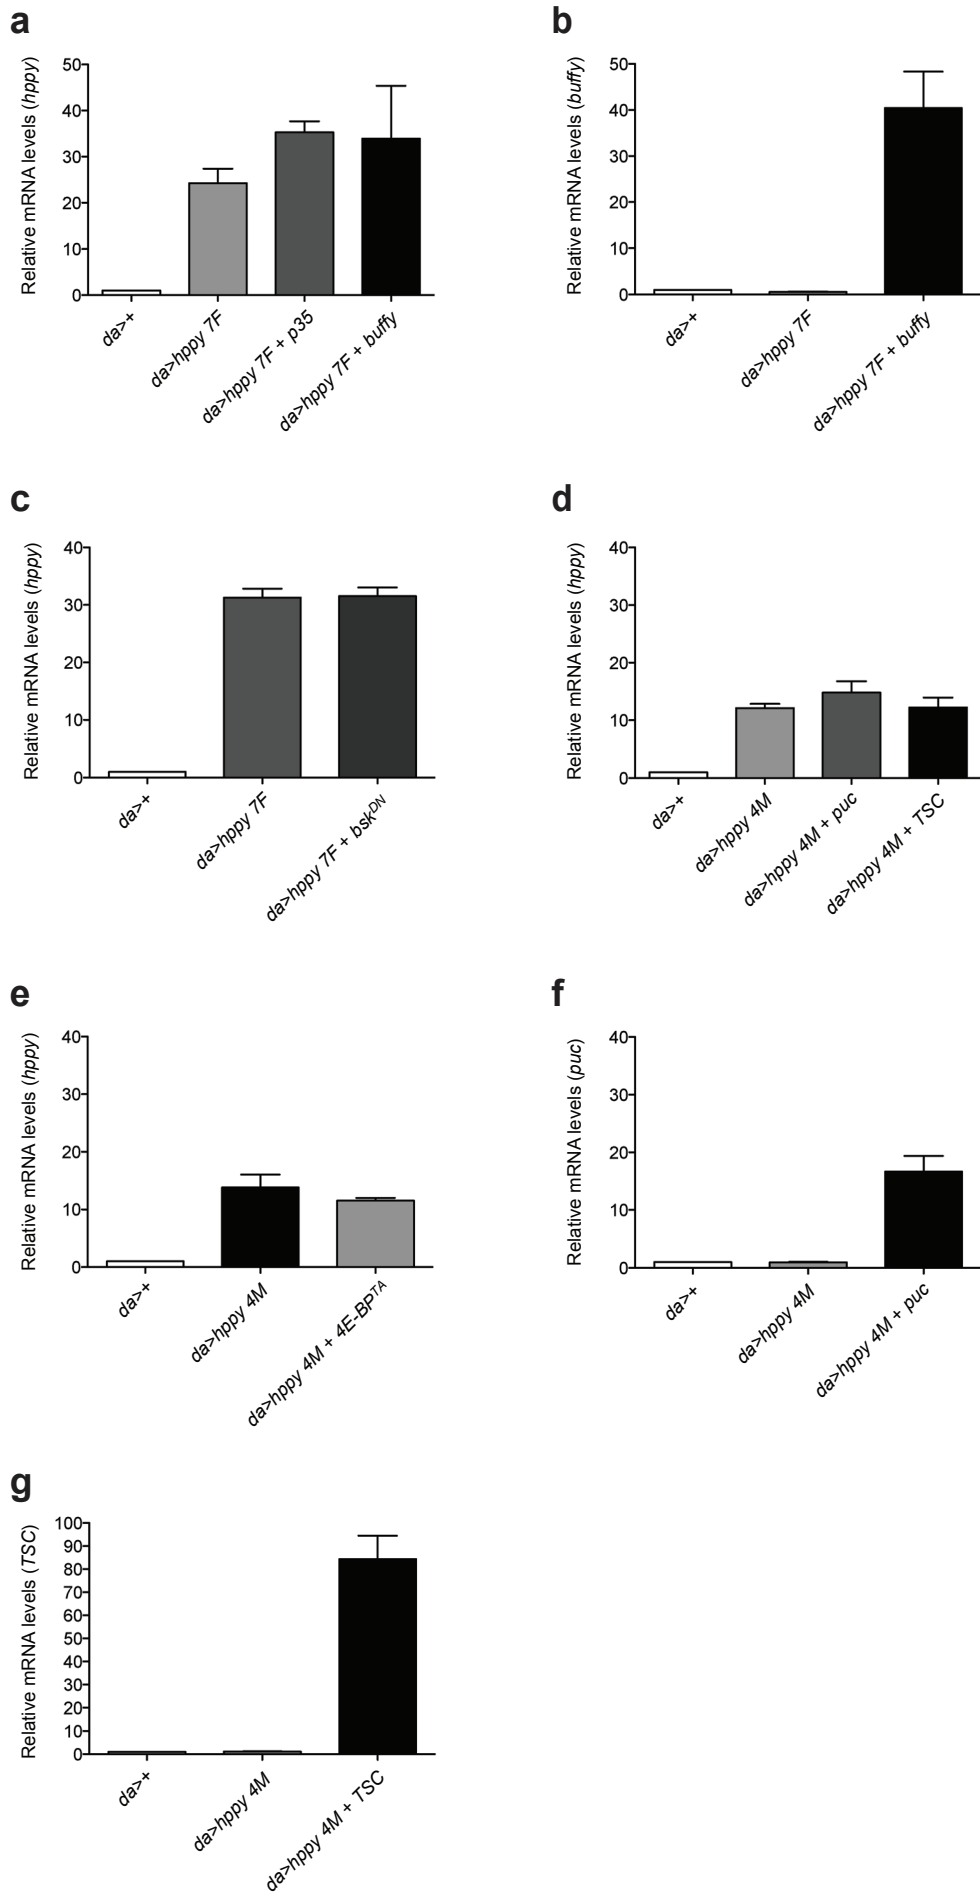

Figure S1, Lam et al.

Supplement: cddis201044x1.pdf [file cddis201044x1.pdf]
